# Supplementary material for: A new mouse model to study the role of ectopic Nanos3 expression in cancer
Source: Springer Nature journal article supplement (doi:10.1186/s12885-019-5807-x), 2019-06-17

Nanos3<sup>LSL/-</sup>;K5Cre<sup>-/-</sup>

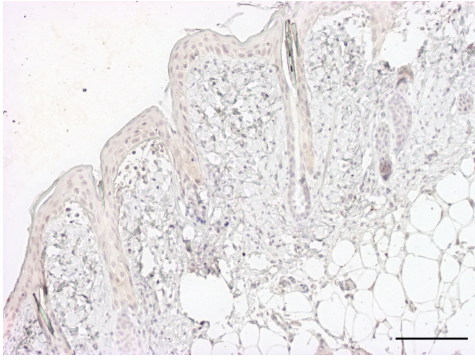

Nanos3<sup>LSL/LSL</sup>;K5Cre<sup>+/-</sup>

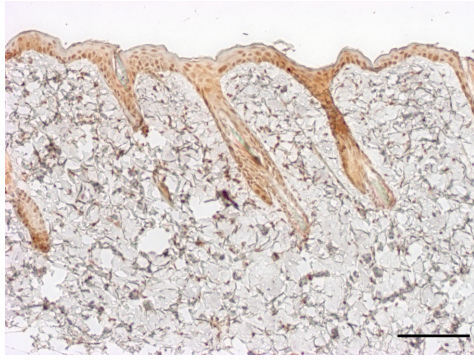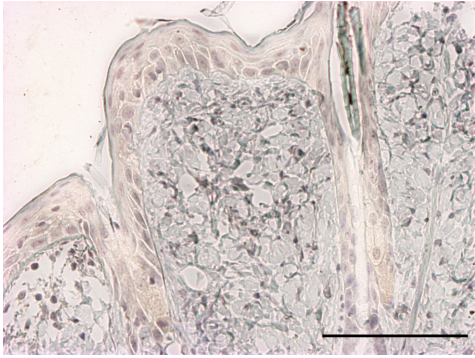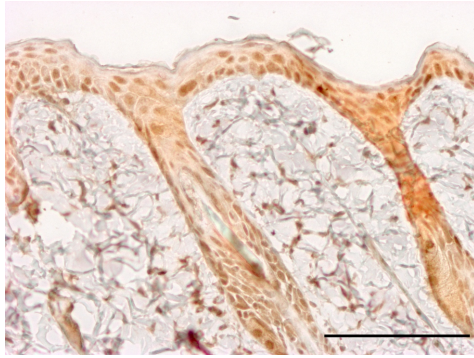

Supplement: MOESM4 [file 16819862]
