# Supplementary material for: A new mouse model to study the role of ectopic Nanos3 expression in cancer
Source: Springer Nature journal article supplement (doi:10.1186/s12885-019-5807-x), 2019-06-17

**A.**

LuTDco

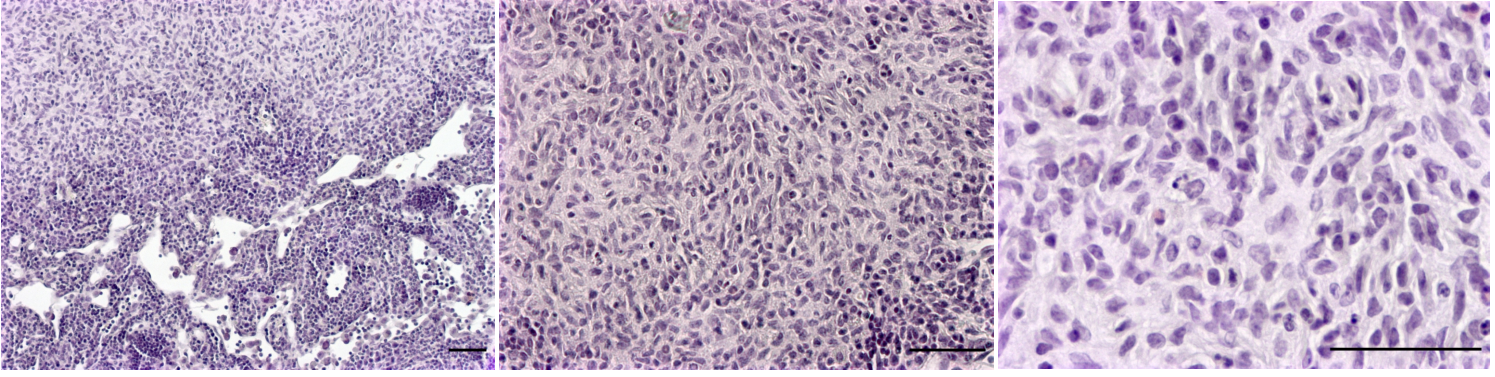

LuTDNa3

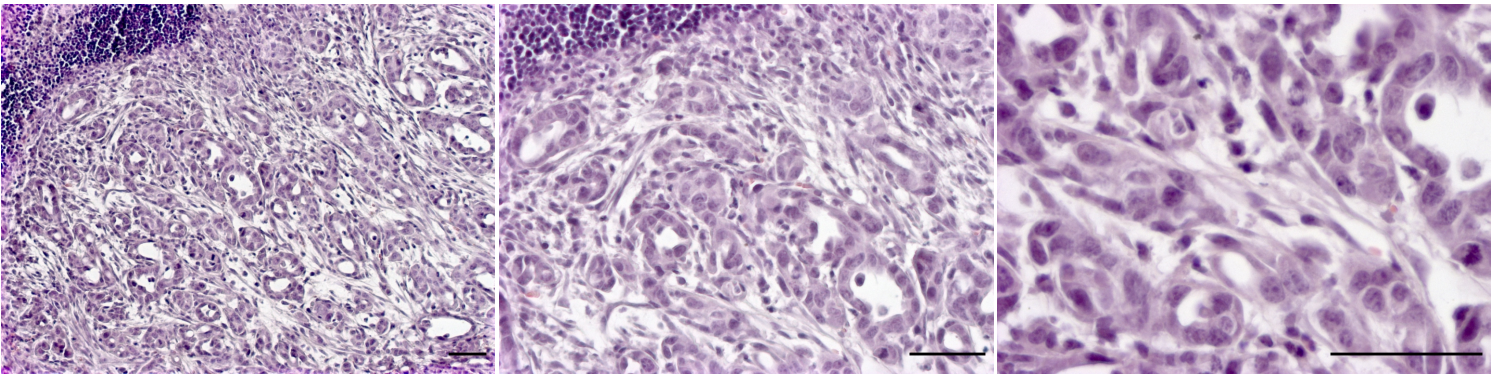

**B.**

LuTDco

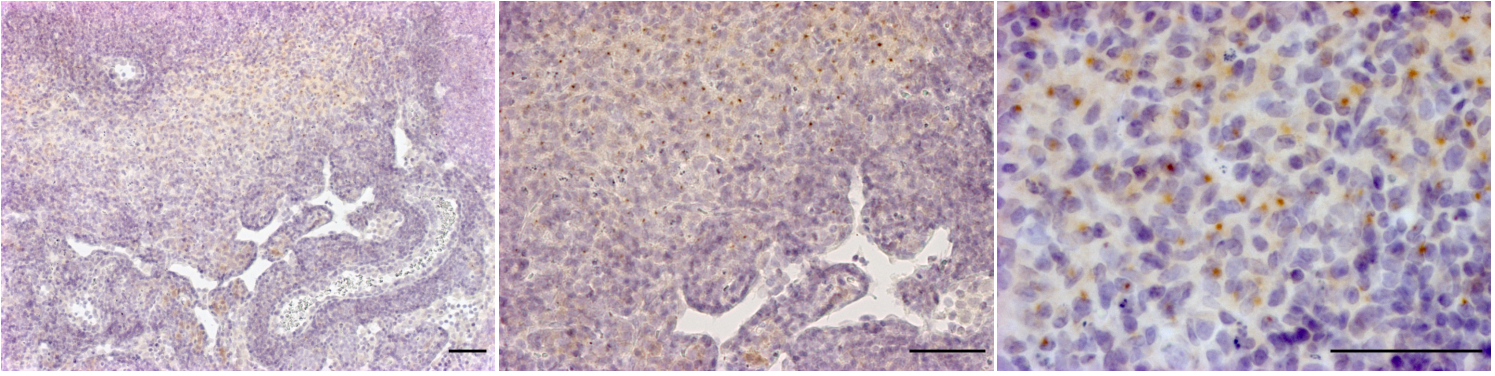

LuTDNa3

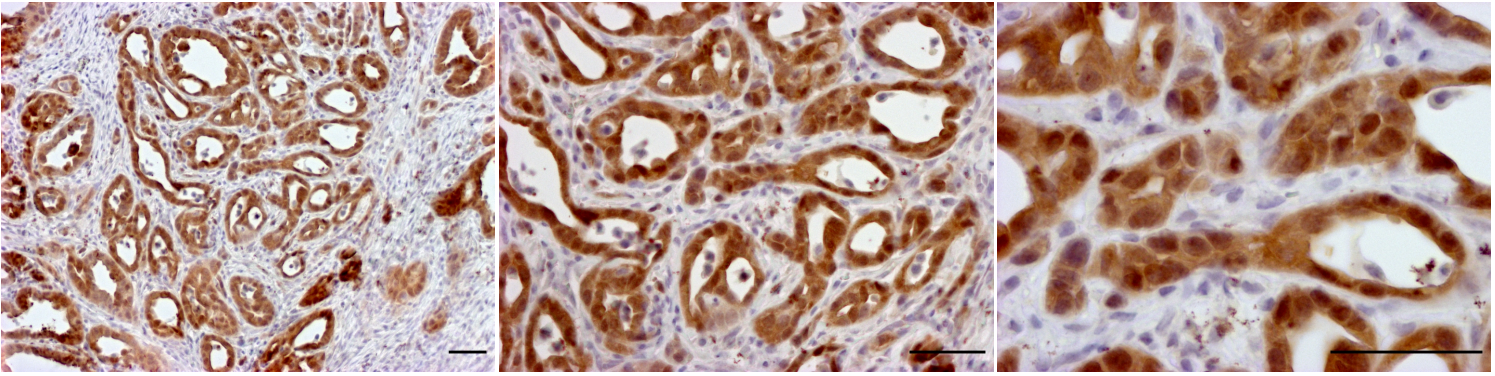

Supplement: MOESM17 [file 16819862]
